1 **Neural pathways linking hypoxia with pectoral fin movements in *Danio rerio***

2

3 Kaila Rosales<sup>1†</sup>, Chen-Min Yeh<sup>1†</sup>, Javier J. How<sup>1,2</sup>, Reginno Villa-Real<sup>1</sup>, Elizabeth DePasquale<sup>1</sup>,  
4 Alex Groisman<sup>3</sup> and Sreekanth H. Chalasani<sup>1,2\*</sup>.

5 <sup>1</sup> Molecular Neurobiology Laboratory, The Salk Institute for Biological Studies, La Jolla, CA  
6 92037.

7 <sup>2</sup> Neurosciences Graduate Program, University of California, San Diego, La Jolla, CA 92093.

8 <sup>3</sup> Department of Physics, University of California San Diego, La Jolla, CA 92093.

9 † These authors contributed equally to this work.

10 \*Author for correspondence: [schalasani@salk.edu](mailto:schalasani@salk.edu) (S.H.C.).

11

12 **Abstract**

13 Zebrafish larvae respond to hypoxia by increasing a number of ventilatory behaviors. During  
14 development, these animals switch from skin-resident to gill-resident neuroendocrine cells  
15 around 7 days post fertilization (d.p.f.) to detect hypoxia and drive adaptive behaviors. Here, we  
16 probe the neural pathways that receive inputs from skin-resident neuroendocrine cells and alter  
17 pectoral fin movements. We first show that a 5 d.p.f. larva increases its pectoral fin movements  
18 and heart activity upon hypoxia exposure. Next, we map the downstream neural circuitry and  
19 show that individual vagal sensory neurons receive inputs from multiple oxygen-sensing  
20 neuroendocrine cells. We then use calcium imaging to show that neurons in the second, but not  
21 third, vagal sensory ganglia show increases in the magnitude of their hypoxia-evoked responses.  
22 Finally, we link purinergic signaling between neuroendocrine cells and second vagal sensory

23 neurons to increases in pectoral fin movements. Collectively, we suggest that vagal sensory  
24 neurons transform hypoxic stimuli into respiratory behaviors.

25

## 26 **Keywords**

27 Zebrafish larvae, oxygen-sensing circuit, neuroendocrine cells, pectoral fin movements, vagal  
28 sensory ganglia.

29

## 30 **Introduction**

31 Animals sense changes in their ambient oxygen levels and alter their behaviors to maintain their  
32 internal oxygen concentration within a normal physiological range. In mammals, the type I cells  
33 of the carotid body and neuroepithelial bodies in the lungs detect changes in environmental or  
34 arterial O<sub>2</sub> and CO<sub>2</sub> concentrations and initiate compensatory changes in ventilation and heart  
35 rate [1-3]. In teleost fish, the O<sub>2</sub>- and CO<sub>2</sub>- sensitive neuroendocrine cells (NECs) of the gills are  
36 homologues of these mammalian chemoreceptors. Zebrafish gill NECs respond to acute hypoxia  
37 and high P<sub>CO2</sub> [4, 5] and contain synaptic vesicles that are believed to be released upon  
38 stimulation onto afferent fibers of the glossopharyngeal and vagus nerves [6, 7]. In addition,  
39 during development these animals transition from anoxia-tolerant embryos to hypoxia-sensitive  
40 larvae within 2-3 days post-fertilization (d.p.f.) [8], but lack innervated gill NECs until 7 d.p.f.  
41 [9]. Despite this, 3-7 d.p.f. larvae show robust hyperventilatory responses to hypoxia [9], which  
42 are mediated by a population of skin NECs [10]. However, it is not clear whether the skin and  
43 gill NECs share common downstream neural circuitry.

44         During development, the underlying neural circuits affect different behavioral adaptations  
45 to hypoxia. For example, the anoxia-tolerant 2 d.p.f. embryos can alter their frequency of

46 pectoral fin and body movements after exposure to hypoxic solution. After hatching, 3 d.p.f.  
47 larvae show a significant increase in their rate of buccal and opercular movements (collectively  
48 termed ventilation behavior) during hypoxia. This response is irregular in frequency, but was  
49 found to be synchronous with the movement of pectoral fins [9, 10]. In addition, a role for  
50 pectoral fin movements in cutaneous gas exchange was also identified using ablation studies [11,  
51 12]. While adult and juvenile pectoral fin swimmers increase their fin beat frequency to achieve  
52 greater swim speeds [13, 14], zebrafish larvae show no change in pectoral fin beats during rapid  
53 swimming [12]. Instead, pectoral fin movements were found to bring distant fluid toward the  
54 body and move it caudally behind the fins disrupting the boundary layer along the animal's skin,  
55 a site for oxygen absorption in larvae [12]. Consistently, we and others have shown that 5 d.p.f  
56 larvae increase their pectoral fin movements upon hypoxia exposure [12, 15-17].

57         While gill NECs synapse onto afferent fibers of the glossopharyngeal and vagal nerves  
58 likely using catecholamine and serotonin neurotransmitters [6, 18], little is known about the  
59 signaling between the skin NECs and their downstream neural circuitry. This is particularly  
60 relevant to our understanding of how the hypoxia sensing-neural circuits are altered during  
61 development, matching the demand of the growing animal. We use sparse labeling in transgenic  
62 larvae to show that the skin NECs are innervated by vagal sensory neurons. Next, we combine  
63 calcium imaging, pharmacology and cell ablations to reveal a role for purinergic signaling  
64 between skin NECs and neurons of the second vagal ganglion in modifying pectoral fin  
65 movements. Together, this work reveals a potential circuit involved in ventilatory behaviors in  
66 larval zebrafish

67

68 **Results**

## 69 **Larval zebrafish increase their pectoral fin movements and heart activity upon hypoxia**

70 Previous studies have identified a role for pectoral fin movements in mediating larval  
71 responses to hypoxia [12, 16]. Additionally, zebrafish larvae have also been shown to increase  
72 their heart rate in response to hypoxia [19]. We previously used a microfluidic device that  
73 rapidly reduced the level of oxygen in the media around the larva [15]. In that device, the larvae  
74 were relatively free to move, making it poorly suited for obtaining imaging data at cellular  
75 resolution, which would be required for probing the underlying neuronal circuits. To overcome  
76 this challenge, we designed a new microfluidic-based device where the trunk and the head of a 5  
77 d.p.f. larva are trapped in an agarose gel (Figure 1A, 1B). This device allows us to monitor both  
78 pectoral fin and heart movements (Figure 1C). We observed that larvae increase their rate of  
79 pectoral fin movements to both strong and weak hypoxia and heart activity to strong hypoxia  
80 alone (Figure 1C-1E, Supplementary Videos S1, S2). To test whether these behavioral changes  
81 are specific to hypoxia we also analyzed larval responses to a different stressor, osmotic shock.  
82 We found that larvae exposed to water containing high amounts of sodium chloride, which is  
83 known to increase cortisol levels in larvae [20], which reduces pectoral fin movements and  
84 increases heart activity (Figure 1F, 1G). Taken together, these data suggest that the increased  
85 rates of pectoral fin movements are specific to hypoxia-induced stress.

86

## 87 **Skin NECs send afferents onto neurons of cranial sensory ganglia**

88 In the 5 d.p.f. larvae, the skin NECs can be identified by serotonin immunolabeling and are  
89 distributed over the entire skin [10]. We hypothesized that these skin NECs would synapse onto  
90 neuronal afferents from one or more of the four cranial sensory ganglia (trigeminal, facial,  
91 glossopharyngeal, and vagal) that are known to transduce somatosensory, chemosensory and

92 viscerosensory information from receptors in head, throat, heart and body viscera to the brain  
93 [21]. To test our hypothesis, we used transgenic animals where GFP expression was driven by  
94 the promoter of a P2X(3) purinoceptor subunit and labels neuronal cell bodies and processes of  
95 these cranial ganglia [22]. We were able to identify the cell bodies of the glossopharyngeal  
96 ganglion (IX), and the three sub clusters of the vagal ganglia (X-1,X-2, and X-3) (Figure 2A, 2B).  
97 We double-labeled *tg(p2xr3.2::eGFP<sup>sl</sup>)* with anti-*gfp* and anti-serotonin antibodies and found  
98 that skin NECs appear to be innervated by dendritic processes from neurons in both  
99 glossopharyngeal and vagal ganglia (Figure 2C). These results suggest that skin NECs,  
100 particularly those that are close to the gills in the 5 d.p.f. larvae are innervated by  
101 glossopharyngeal and vagal neurons.

102         Next, we tested the relationship between skin NECs and vagal sensory neurons using  
103 sparse labeling. We crossed a *tg(PB4:GAL4)* fish with *tg(UAS::kaede)* fish to obtain embryos  
104 where the fluorescent protein kaede is expressed in populations of cranial sensory neurons [23].  
105 We observed a range of kaede expression in the progeny of this cross with some embryos  
106 showing labeling in only a few cranial sensory neurons, while others labeled the entire  
107 population. We sorted this population to identify those embryos where *kaede* expression was  
108 limited to one or a few vagal sensory neurons and labeled these animals with anti-kaede and anti-  
109 serotonin antibodies. We observed that individual vagal sensory neurons receive inputs from  
110 multiple NECs (Figure 2D). We also quantified the number of vagal sensory neurons and  
111 contacting NECs across multiple animals and found that individual vagal sensory neurons  
112 received inputs from 2-5 skin NECs (Figure 2E). Taken together, these studies suggest that  
113 multiple skin NECs send inputs to vagal sensory neurons in the 5 d.p.f. larva.

114

115 **Second, but not third, vagal ganglionic neurons respond to hypoxia**

116 To study how the downstream vagal sensory ganglia responded to hypoxia, we used a  
117 light sheet microscope to record calcium responses in the neurons of both the 2<sup>nd</sup> and 3<sup>rd</sup> vagal  
118 sensory ganglia in larvae expressing neuronal nuclei-localized GCaMP6f [24] (it is technically  
119 difficult to record from the 1<sup>st</sup> vagal ganglia). We observed recurring calcium events lasting a  
120 few seconds that were particularly prevalent in neurons of the second compared to third vagal  
121 sensory ganglion (Figure 3C, Supplementary Figure S1, S2, Supplementary Videos S3, S4).

122 To characterize these calcium transients, we devised an algorithm to identify the peaks in  
123 fluorescence which likely correspond to either bursts or single action potentials (Figure 3D. and  
124 see Methods). We found that strongly hypoxic conditions induced transients in the second vagal  
125 sensory ganglion that were larger than in weakly hypoxic conditions ( $p = 0.01$ ); however, the  
126 transients under strong and weak hypoxia were indistinguishable from normoxia (Figure 3E).  
127 This suggests that under normoxia the transients in this ganglion have highly variable  
128 magnitudes, but they tend towards smaller magnitudes under weak hypoxia and larger  
129 magnitudes under strong hypoxia. Consistent with this hypothesis, the magnitude of responses in  
130 the second ganglion was most strongly correlated with the partial pressure of oxygen ( $pO_2$ ) at  
131 values of *weight* near 0.7, with a statistically significant ( $p < 0.05$ ) correlation at these values,  
132 and showed larger magnitude validated peaks at lower  $pO_2$  (Figure 3F, p-value of linear  
133 regression is 0.01; Supplementary Figure S4A,B). We also analyzed the average number of  
134 transients (Figure 3G) and average length of time between transients (Figure 3H) in both ganglia,  
135 but did not find any significant correlation with  $pO_2$ . We also note that normoxia and hypoxia  
136 tended to activate separate subpopulations of neurons in either ganglion (data not shown).

137 Collectively, our results indicate that oxygen level modulates the magnitude of calcium events in  
138 neurons of the second vagal sensory ganglion in a graded manner.

139

140 **Purinergic signaling between NECs and neurons in the second vagal ganglion modifies**  
141 **pectoral fin movements**

142 We next used small molecule agonists to gain insights into the neurotransmitter pathways that  
143 may relay oxygen information from NECs to vagal sensory neurons. Previous studies have  
144 shown that ATP induces burst activity in the zebrafish petrosal sensory neurons and drives  
145 hypoxia-induced respiratory responses [25, 26]. Moreover, zebrafish larvae express purinergic  
146 receptors in their cranial sensory neurons and increase their rate of pectoral fin movements in  
147 response to ATP agonist [22, 27]. Therefore, we hypothesized that purinergic signaling can  
148 activate the vagal sensory neurons and drive pectoral fin movements in larval zebrafish. Animals  
149 treated with a P2 purinoceptor agonist,  $\alpha,\beta$ -methyleneadenosine, at either of two concentrations  
150 showed an increase in pectoral fin movements (Figure 4A,4B), suggesting that purinergic  
151 signaling modifies respiratory behavior. In contrast the agonist increased heart activity only at  
152 higher concentrations (Figure 4C, 4D). Next, we tested whether this agonist-evoked behavioral  
153 response required neurons in the second or third vagal ganglia. We found that ablating the  
154 second, but not the third, vagal sensory ganglion attenuated the agonist-induced increase in  
155 pectoral fin movements, suggesting that the second vagal sensory ganglion is activated by  
156 purinergic signaling to drive respiratory behavior (Figure 4E, Supplementary Figure S5). On the  
157 other hand, ablating neither the second nor third ganglion seemed to have an effect on purinergic  
158 modulation of the heart activity (Figure 4F). Taken together, our experiments suggest that the

159 neuroendocrine cell-vagal sensory neuron synapses use purinergic signaling to modulate  
160 hypoxia-triggered respiratory behaviors.

161

## 162 **Discussion**

163 Our study shows that vagal sensory neurons respond to changes in environmental oxygen  
164 and likely drive hypoxia-induced behaviors in zebrafish larvae. We also suggest that individual  
165 vagal sensory neurons receive inputs from multiple NECs and increase pectoral fin movements  
166 to facilitate respiration upon exposure to hypoxia. Finally, we find that the magnitude of calcium  
167 events in vagal sensory neurons is modulated by pO<sub>2</sub>. As others have shown that the magnitude  
168 of change in GCaMP fluorescence is positively correlated with the level of neuronal activation  
169 [28], this suggests that neurons in the second vagal ganglion are more likely to fire more action  
170 potentials upon exposure to severe hypoxia, and this may drive an increase in pectoral fin  
171 movements.

172 Where do the vagal axons project? The central projections of the glossopharyngeal and  
173 the four vagal sub-ganglia enter the hindbrain at the presumptive rhombomere 6 via a series of  
174 nerve roots to form a plexus that could also contain axons of the facial neurons [22].  
175 Interestingly, the posterior half of the vagal motor nucleus is directly dorsal to the pectoral and  
176 occipital motor neurons [29]. While the circuitry between vagal axons and pectoral motor  
177 neurons has not been mapped, we propose that this connection might play a crucial role in  
178 altering pectoral fin movements upon hypoxic activation of vagal sensory ganglia.

179 We posit that the NEC-mediated purinergic activation of vagal sensory neurons is key to  
180 initiating hypoxia-induced respiratory behavior, making it similar to the initiation of nociception,  
181 pain, and other mechanical sensations [30, 31]. Neuroendocrine cells in the zebrafish larvae are



182 similar to the Type I glomus cells of the mammalian carotid body. Cell culture and mouse  
183 knock-out studies have been used to confirm a central role for ATP and its receptors P2X2/X3 in  
184 mediating signaling between the Type I glomus cells and nearby petrosal neurons [32-34]. We  
185 showed that ATP agonists increase respiratory behaviors (i.e., pectoral fin movements) in  
186 zebrafish larvae, and that this response was blocked by ablating neurons in the second, but not  
187 third, vagal sensory ganglia. These results imply that zebrafish NECs also release ATP to  
188 activate neurons in the second vagal ganglion. While we are unable to directly monitor activity in  
189 the NECs, we speculate that hypoxia depolarizes these cells, which then leads to a calcium-  
190 dependent release of ATP and subsequent activation of the downstream neurons in the second  
191 vagal ganglion. Future studies should aim to test this proposed circuit.

192         We monitored changes in pectoral fin movements in animals experiencing hypoxia.  
193 Pectoral fins are not required for the initiation of swimming or for rhythmic swimming behaviors  
194 in zebrafish larvae. Rather pectoral fin movements facilitate gas exchange near the skin of the  
195 animal [12]. Our results are consistent with a role for pectoral fins in respiratory behavior. We  
196 suggest that larvae exposed to hypoxia in our microfluidic devices increase their pectoral fin  
197 movements to bring water with higher  $pO_2$  caudally over the fins to increase their exposure to  
198 oxygen. Furthermore, when these efforts are unsuccessful, they increase their tail and posterior  
199 body movements to escape (“delayed startle responses” [35]). In summary, our analyses suggest  
200 a role for purinergic signaling at the many oxygen-sensing neuroendocrine cells-vagal sensory  
201 neuron synapse to drive respiratory behaviors in response to hypoxia. We also suggest that  
202 further analysis of this circuit will reveal additional insights into signaling pathways that may be  
203 conserved across species.

204

## 205 **Methods**

### 206 **Calcium imaging and analysis**

207 The imaging setup was described previously [36]. Briefly, single 5 days post fertilization (d.p.f.)  
208 *elavl3:H2B-GCaMP6f* [24] larva with the opercula removed 1 day prior was paralyzed with a  
209 drop of 1mg/ml alpha-bungarotoxin and then embedded in the capillary with 1% low-melting  
210 agarose. A peristaltic pump was used to exchange the media around the larva, switching from  
211 normoxic to hypoxic media (Figure 3A). We used the light-sheet microscope system to excite  
212 neurons within the cranial ganglia and captured the resulting emission at 90ms/frame (Figure 3B).  
213 pO<sub>2</sub> levels were measured in real time and datasets where these levels deviated more than 10%  
214 from the expected value were excluded. Changes in fluorescence from individual neurons were  
215 obtained and denoised after correcting for motion using the MATLAB-based tool CalmAn [37-  
216 41]. MATLAB functions **findpeaks** was used to detect fluorescence transients. We detected  
217 peaks by looking for local maxima that had a prominence at least as large as 1) *weight* multiplied  
218 with the standard deviation of the time series and 2) *weight* multiplied with the mean of the time  
219 series. When the tunable parameter *weight* is set low, relatively weak peaks are counted as spikes;  
220 this may incorrectly classify noise as a spike. On the other hand, when *weight* is set high,  
221 relatively prominent peaks, which may have resulted from actual spikes, may be rejected  
222 (Supplementary Figure S3). Hence, we performed a sensitivity analysis to see how our results  
223 depend on the value of *weight* (Supplementary Figure S4). Specifically, we varied *weight* from  
224 0.5 to 0.8 with 0.01 increments and assessed the strength of responses to various levels of  
225 hypoxia in terms of the average magnitude of detected peaks. We excluded (1) all recordings  
226 where less than 2 neurons were active and (2) all neurons with fewer than 2 transients during the  
227 recording window. The alpha value for testing the significance of each regression was adjusted

228 by the effective number of independent variables, or  $m_{eff}$ , which was computed using a matrix  
229 spectral decomposition approach to account for the fact that two of our variables of interest were  
230 likely correlated (i.e., the number of peaks and the interpeak interval [42]) Hence, alpha was 0.02  
231 ( $= 0.05/m_{eff}$ , where  $m_{eff} = 2.5$ ). It is important to note that, even though the linear regression was  
232 not statistically significant at lower and higher values of *weight*, the negative correlation between  
233 pO<sub>2</sub> and magnitude of response in the second ganglion always remained, suggesting a robust  
234 trend (Supplementary Figure S4C). It is also worth noting that there was never a significant  
235 correlation between pO<sub>2</sub> and magnitude of calcium peaks in the third ganglion at any value of  
236 *weight* (Supplementary Figure S4A,B), nor was there a significant correlation in the second  
237 ganglion under normoxia (Supplementary Figure S4E), suggesting that a simple tuning of *weight*  
238 does not lead to a spuriously significant result.

239

#### 240 **Immunohistochemistry**

241 Larvae were fixed in 4% paraformaldehyde with regions of interest labeled using the following  
242 primary antibodies: goat anti-GFP (1:200; Abcam), rabbit anti-serotonin (1:200; ImmunoStar),  
243 rat anti-serotonin (1:200; Novus Bio), or rabbit anti-Kaede, (1:200; MBL), which in turn were  
244 detected using secondary donkey anti-goat Alexa Fluor 488 (1:1000; Invitrogen), goat anti-rabbit  
245 Alexa Fluor 546 (1:1000; Invitrogen), or donkey anti-rat Alexa Fluor 546 (1:1000; Invitrogen).  
246 Larvae between 4-6 d.p.f. were imaged in 70% glycerol using a Zeiss LSM800 or Olympus  
247 FM1000-MPE system. Subsequent image processing and evaluation were performed in ImageJ.

248

#### 249 **Microfluidic device**

250 The microfluidic device for imaging zebrafish larvae under an inverted microscope is assembled  
251 out of three parts of laser-cut acrylic and a cover glass (Figure 1A). The thicknesses of acrylic in  
252 parts 1, 2, and 3 are 0.75, 0.75, and 1.5 mm, respectively. To bond the parts together, part 1 has  
253 an ~0.13 mm layer of pressure sensitive adhesive (PSA) at the bottom, and part 2 has layers of  
254 the same PSA on both sides. After part 1 is bonded to the cover glass, an ~5 mm diameter, ~0.9  
255 mm deep round cuvette is formed, where a Tricaine-anesthetized zebrafish larva is trapped inside  
256 2.5% low-melting agarose gel (UltraPure LMP Agarose, Invitrogen 16520-050). To facilitate the  
257 exposure of NECs to oxygen in the medium and observe larval movements, the agarose gel is  
258 removed from areas around the gills, pectoral fins, and tail using a thin needle. After parts 2 and  
259 3 are bonded to the top of part 1, a sealed perfusion channel with two inlets and one outlet (holes  
260 in part 3) is formed directly above the trapped animal. The inlets and outlets are connected to  
261 separate medium reservoirs through lines of flexible PVC tubing. The tubing is compression  
262 inserted into laser-cut acrylic ports (~3 mm thick, ~6 mm in diameter) that have sticky rings of  
263 ~0.6 mm thick PSA at the bottom, and the ports are bonded to part 3, placing the tubing lines  
264 coaxially with the inlets and outlet (Figure 3A). The flow through the device is driven by a  
265 peristaltic pump connected to the outlet. At any given time, only one of the inlet tubing lines is  
266 open, while the other is blocked (Figure 3A).

267 The microfluidic device for imaging of zebrafish larvae under a light sheet microscope is  
268 assembled out of four parts of laser-cut acrylic and has two small thin windows, for the imaging  
269 objective and light sheet (Figure 3A). The thicknesses of acrylic in parts 1 – 4 are 0.2, 1.5, 0.5,  
270 and 0.25 mm respectively. The imaging window is 0.05 mm thick and made of COP, and the  
271 acrylic light sheet window is 0.2 mm thick. To bond the parts together, part 2 has an ~0.13 mm  
272 layer of a PSA at the top, and part 3 has layers of the same PSA on both sides. After the imaging

273 window is glued to part 1, and parts 1 – 3 are bonded together, the light sheet window is glued to  
274 the front, and the entire assembly is turned upside down. A small amount of 2.5% low-melting  
275 agarose gel with *Tricaine* is dispensed into the cuvette formed by the cavities in parts 1 and 2, a  
276 *Tricaine*-anesthetized zebrafish larva is placed into the cuvette, and the excess of gel pre-  
277 polymer is removed, leaving the larva barely covered. Solidified gel is removed from areas  
278 around the gills, pectoral fins, and tail using a thin needle. Part 4 is bonded to part 3, making a  
279 sealed microfluidic device with two inlets and one outlet and with a perfusion chamber (part 3)  
280 beneath the partially immobilized larva. The inlet and outlet ports with PVC tubing (same as in  
281 the device in the previous paragraph) are bonded to the top (Figure 3A).

282

### 283 **Behavioral analysis**

284 All the behavioral data were recorded from 5 d.p.f. wildtype *wik* strain or *Tg(p2rx3.2:gfp)<sup>sl1</sup>*  
285 strain [22] raised under 14/10 light cycles in E2 medium. An oxygen meter (PreSens: Fibox 4,  
286 sensor: Cat. 200000241 and cell: Cat. 200001690) was attached to the outlet to measure the  
287 oxygen concentrations of the medium in real time (5-10 sec/read). The recording setup consists  
288 of a Basler aca1300 camera (60 fps, Edmond Optics), illuminating base (Tritech Research,  
289 stereo-microscope base) with a set of lenses (Scheider Inc., catalogue #s 25-1070160, 25-020178,  
290 25-011726, 25-020155, and 25-020052) and Noldus EthoVision XT10 software. Individual  
291 regions of interest were assigned to the pectoral fins and heart (Figure 1C) and the movements  
292 within the regions were detected by Noldus software (heartbeat detector). The percentage of the  
293 pixels that change intensity in individual regions were defined as activity. Pectoral fin and heart  
294 activity were analyzed. Hypoxia was induced by feeding into the microfluidic device a medium  
295 equilibrated with a hypoxic gas mixture (E2 bubbled with nitrogen/air mixture which reduces

296 pO<sub>2</sub>). The pO<sub>2</sub> range was 130 mmHg for normoxia, 60-80 mmHg for mild hypoxia and 10-35  
297 mmHg for strong hypoxia. Osmotic shock was induced by adding 100 mM or 250 mM sodium  
298 chloride solution into the microfluidic device. For drug treatments,  $\alpha,\beta$ - methyleneadenosine 5'-  
299 triphosphate trisodium salt (TOCRIS: Cat. 3209), hydrochloride were dissolved into 100 mM  
300 stock in Milli-Q water and further diluted into different concentrations. Each larva was trapped  
301 and its behavior monitored with control solution before being replaced with drug-containing  
302 solutions.

303

### 304 **Laser ablation**

305 Ablations were performed on *Tg(p2rx3.2:gfp)<sup>sl1</sup>* larvae at 3 d.p.f. Larvae were anesthetized with  
306 Tricaine and mounted laterally on cover slides. Tricaine was used at a working dilution of 1.2ml  
307 in 20ml of E2 medium (Stock 4g/1000 ml, Tricaine MP Biomedicals #103106). Imaging and  
308 ablation were performed with Olympus FM1000-MPE system with 25x water immersion lens  
309 (XLPL25XWMP). An 800 nm laser beam was focused onto individual cranial sensory ganglion  
310 for 5 seconds, and clear lesions were detected. The ablation of neurons was confirmed before  
311 behavioral experiments.

312

### 313 **Statistics**

314 Unless stated otherwise, data points represent averages of all data and error bars are standard  
315 error of the mean (S.E.M.). Two-tailed one sample *t*-test were used to test the differences  
316 between the control and treated groups. Two-tailed Student's *t*-tests or Mann-Whitney *U*-tests  
317 (when the data did not comply with the assumptions of the *t*-test) were used for two-group  
318 comparisons. ANOVAs were used for multiple group comparisons, followed by Bonferroni's or

319 Sidak's multiple comparison test. Prism 8 (GraphPad) was used for other analysis and generating  
320 plots. Unless stated otherwise, \* indicates  $p < 0.1$ , \*\* indicates  $p < 0.05$ .

321

### 322 **Data and Code Availability**

323 The code used to analyze calcium imaging data along with the data are available at  
324 <https://github.com/shreklab/Rosales-Yeh2021>. Further information and requests for resources  
325 and reagents should be directed to and will be fulfilled by the Lead Contact, Sreekanth H.  
326 Chalasani ([schalasani@salk.edu](mailto:schalasani@salk.edu)).

327

### 328 **Supplementary Data**

329 Supplementary Information includes five supplementary figures (S1-S5), and four supplementary  
330 videos (S1-S4).

331

### 332 **Acknowledgements**

333 We thank D. Thai and a number of UCSD undergraduates who helped with zebrafish care and  
334 maintenance. We also thank L.A. Hale and M. Erickstad for inputs into our behavioral setup,  
335 Uri Manor and the Waitt Advanced Biophotonics Center for imaging resources, W. van  
336 Giessen for technical advice on analyzing behavior data, C. Fernandes for illustrations, H.  
337 Burgess, S. Navlakha, J. Fetcho, G. Haddad, S. Ryu, E. Mukamel, J. Wang, D. O'Keefe, C.  
338 Lee-Kubli, M. Matty, M. Rieger, and A. Singh for comments on the manuscript. We are  
339 grateful to all the members of the Chalasani laboratory for critical help, advice and insights.  
340 C-M. Yeh was supported by a Salk Pioneer Fellowship. This work was funded by innovation  
341 grants from the Kavli Institute of Brain and Mind, UCSD (C-M.Y and G.M.P), and the Salk

342 Institute for Biological Studies (S.H.C.), NSF award 1411313 (A.G.). The Waitt Advanced  
343 Biophotonics Center is supported by NCI CCSG P30014195.

344

#### 345 **Author Contributions**

346 K.R. performed experiments and analyzed data. C-M.Y. conceived, designed, and performed  
347 experiments. J.J.H. analyzed the data. R.V-R., and E.D performed experiments, A.G. designed  
348 the microfluidic device and co-wrote the manuscript, and S.H.C. conceived the experiments and  
349 co-wrote the manuscript.

350

#### 351 **Declaration of interests**

352 The authors declare no competing interests.

353

#### 354 **Figure Legends**

355 Legends are included in the figures.

356

#### 357 **References**

- 358 1. Kumar P, Prabhakar NR: **Peripheral chemoreceptors: function and plasticity of the**  
359 **carotid body**. *Compr Physiol* 2012, **2**(1):141-219.
- 360 2. Lopez-Barneo J, Gonzalez-Rodriguez P, Gao L, Fernandez-Aguera MC, Pardal R,  
361 Ortega-Saenz P: **Oxygen sensing by the carotid body: mechanisms and role in**  
362 **adaptation to hypoxia**. *Am J Physiol Cell Physiol* 2016, **310**(8):C629-642.
- 363 3. Domnik NJ, Cutz E: **Pulmonary neuroepithelial bodies as airway sensors: putative**  
364 **role in the generation of dyspnea**. *Current opinion in pharmacology* 2011, **11**(3):211-  
365 217.
- 366 4. Jonz MG, Fearon IM, Nurse CA: **Neuroepithelial oxygen chemoreceptors of the**  
367 **zebrafish gill**. *J Physiol* 2004, **560**(Pt 3):737-752.
- 368 5. Qin Z, Lewis J, Perry S: **Zebrafish (Danio rerio) gill neuroepithelial cells are sensitive**  
369 **chemoreceptors for environmental CO2**. *The Journal of physiology* 2010, **588**(5):861-  
370 872.



- 371 6. Jonz MG, Nurse CA: **Neuroepithelial cells and associated innervation of the zebrafish**  
372 **gill: a confocal immunofluorescence study.** *J Comp Neurol* 2003, **461**(1):1-17.
- 373 7. Sundin L, Nilsson S: **Branchial innervation.** *Journal of Experimental Zoology* 2002,  
374 **293**(3):232-248.
- 375 8. Mendelsohn BA, Kassebaum BL, Gitlin JD: **The zebrafish embryo as a dynamic model**  
376 **of anoxia tolerance.** *Developmental dynamics: an official publication of the American*  
377 *Association of Anatomists* 2008, **237**(7):1780-1788.
- 378 9. Jonz MG, Nurse CA: **Development of oxygen sensing in the gills of zebrafish.** *J Exp*  
379 *Biol* 2005, **208**(Pt 8):1537-1549.
- 380 10. Coccimiglio ML, Jonz MG: **Serotonergic neuroepithelial cells of the skin in**  
381 **developing zebrafish: morphology, innervation and oxygen-sensitive properties.** *J*  
382 *Exp Biol* 2012, **215**(Pt 22):3881-3894.
- 383 11. Rombough PJ: **2 Respiratory gas exchange, aerobic metabolism, and effects of**  
384 **hypoxia during early life.** In: *Fish physiology.* vol. 11: Elsevier; 1988: 59-161.
- 385 12. Green MH, Ho RK, Hale ME: **Movement and function of the pectoral fins of the**  
386 **larval zebrafish (*Danio rerio*) during slow swimming.** *J Exp Biol* 2011, **214**(Pt  
387 18):3111-3123.
- 388 13. Hale ME, Day RD, Thorsen DH, Westneat MW: **Pectoral fin coordination and gait**  
389 **transitions in steadily swimming juvenile reef fishes.** *Journal of Experimental Biology*  
390 2006, **209**(19):3708-3718.
- 391 14. Mussi M, Summers A, Domenici P: **Gait transition speed, pectoral fin-beat frequency**  
392 **and amplitude in *Cymatogaster aggregata*, *Embiotoca lateralis* and *Damalichthys***  
393 ***vacca*.** *Journal of Fish Biology* 2002, **61**(5):1282-1293.
- 394 15. Erickstad M, Hale LA, Chalasani SH, Groisman A: **A microfluidic system for studying**  
395 **the behavior of zebrafish larvae under acute hypoxia.** *Lab Chip* 2015, **15**(3):857-866.
- 396 16. Zimmer AM, Mandic M, Rourke KM, Perry SF: **Breathing with fins: do the pectoral**  
397 **fins of larval fishes play a respiratory role?** *American Journal of Physiology-*  
398 *Regulatory, Integrative and Comparative Physiology* 2020, **318**(1):R89-R97.
- 399 17. Abdallah SJ, Thomas BS, Jonz MG: **Aquatic surface respiration and swimming**  
400 **behaviour in adult and developing zebrafish exposed to hypoxia.** *Journal of*  
401 *Experimental Biology* 2015, **218**(11):1777-1786.
- 402 18. Bailly Y: **Serotonergic neuroepithelial cells in fish gills: cytology and innervation.**  
403 *Airway chemoreceptors in the vertebrates* 2009:61-97.
- 404 19. Jacob E, Drexel M, Schwerte T, Pelster B: **Influence of hypoxia and of hypoxemia on**  
405 **the development of cardiac activity in zebrafish larvae.** *American Journal of*  
406 *Physiology-Regulatory, Integrative and Comparative Physiology* 2002, **283**(4):R911-  
407 R917.
- 408 20. Yeh C-M, Glöck M, Ryu S: **An optimized whole-body cortisol quantification method**  
409 **for assessing stress levels in larval zebrafish.** *PLoS one* 2013, **8**(11):e79406.
- 410 21. Zhang L-L, Ashwell K: **The development of cranial nerve and visceral afferents to**  
411 **the nucleus of the solitary tract in the rat.** *Anatomy and embryology* 2001, **204**(2):135-  
412 151.
- 413 22. Kucenas S, Soto F, Cox JA, Voigt MM: **Selective labeling of central and peripheral**  
414 **sensory neurons in the developing zebrafish using P2X(3) receptor subunit**  
415 **transgenes.** *Neuroscience* 2006, **138**(2):641-652.

- 416 23. LaMora A, Voigt MM: **Cranial sensory ganglia neurons require intrinsic N-cadherin**  
417 **function for guidance of afferent fibers to their final targets.** *Neuroscience* 2009,  
418 **159(3):1175-1184.**
- 419 24. Dunn TW, Mu Y, Narayan S, Randlett O, Naumann EA, Yang CT, Schier AF, Freeman J,  
420 Engert F, Ahrens MB: **Brain-wide mapping of neural activity controlling zebrafish**  
421 **exploratory locomotion.** *eLife* 2016, **5:e12741.**
- 422 25. Alcayaga J, Cerpa V, Retamal M, Arroyo J, Iturriaga R, Zapata P: **Adenosine**  
423 **triphosphate-induced peripheral nerve discharges generated from the cat petrosal**  
424 **ganglion in vitro.** *Neurosci Lett* 2000, **282(3):185-188.**
- 425 26. Monteiro EC, Ribeiro JA: **Ventilatory effects of adenosine mediated by carotid body**  
426 **chemoreceptors in the rat.** *Naunyn Schmiedebergs Arch Pharmacol* 1987, **335(2):143-**  
427 **148.**
- 428 27. Coe AJ, Picard AJ, Jonz MG: **Purinergic and adenosine receptors contribute to**  
429 **hypoxic hyperventilation in zebrafish (Danio rerio).** *Comp Biochem Physiol A Mol*  
430 *Integr Physiol* 2017, **214:50-57.**
- 431 28. Chen TW, Wardill TJ, Sun Y, Pulver SR, Renninger SL, Baohan A, Schreiter ER, Kerr  
432 RA, Orger MB, Jayaraman V *et al*: **Ultrasensitive fluorescent proteins for imaging**  
433 **neuronal activity.** *Nature* 2013, **499(7458):295-300.**
- 434 29. Ma L-H, Gilland E, Bass AH, Baker R: **Ancestry of motor innervation to pectoral fin**  
435 **and forelimb.** *Nature communications* 2010, **1(1):1-8.**
- 436 30. Surprenant A, North RA: **Signaling at purinergic P2X receptors.** *Annu Rev Physiol*  
437 2009, **71:333-359.**
- 438 31. Burnstock G, Wood JN: **Purinergic receptors: their role in nociception and primary**  
439 **afferent neurotransmission.** *Curr Opin Neurobiol* 1996, **6(4):526-532.**
- 440 32. Reyes EP, Fernandez R, Larrain C, Zapata P: **Carotid body chemosensory activity and**  
441 **ventilatory chemoreflexes in cats persist after combined cholinergic-purinergic**  
442 **block.** *Respir Physiol Neurobiol* 2007, **156(1):23-32.**
- 443 33. Zhang M, Zhong H, Vollmer C, Nurse CA: **Co-release of ATP and ACh mediates**  
444 **hypoxic signalling at rat carotid body chemoreceptors.** *J Physiol* 2000, **525 Pt 1:143-**  
445 **158.**
- 446 34. Leonard EM, Salman S, Nurse CA: **Sensory Processing and Integration at the Carotid**  
447 **Body Tripartite Synapse: Neurotransmitter Functions and Effects of Chronic**  
448 **Hypoxia.** *Front Physiol* 2018, **9:225.**
- 449 35. Colwill RM, Creton R: **Imaging escape and avoidance behavior in zebrafish larvae.**  
450 *Rev Neurosci* 2011, **22(1):63-73.**
- 451 36. Icha J, Schmied C, Sidhaye J, Tomancak P, Preibisch S, Norden C: **Using Light Sheet**  
452 **Fluorescence Microscopy to Image Zebrafish Eye Development.** *J Vis Exp*  
453 2016(110):e53966.
- 454 37. Giovannucci A, Friedrich J, Gunn P, Kalfon J, Brown BL, Koay SA, Taxidis J, Najafi F,  
455 Gauthier JL, Zhou P *et al*: **CaImAn an open source tool for scalable calcium imaging**  
456 **data analysis.** *eLife* 2019, **8.**
- 457 38. Pnevmatikakis EA, Soudry D, Gao Y, Machado TA, Merel J, Pfau D, Reardon T, Mu Y,  
458 Lacefield C, Yang W *et al*: **Simultaneous Denoising, Deconvolution, and Demixing of**  
459 **Calcium Imaging Data.** *Neuron* 2016, **89(2):285-299.**

- 460 39. Pnevmatikakis EA, Gao Y, Soudry D, Pfau D, Lacefield C, Poskanzer K, Bruno R, Yuste  
461 R, Paninski L: **A structured matrix factorization framework for large scale calcium**  
462 **imaging data analysis**. *arXiv preprint arXiv:14092903* 2014.
- 463 40. Friedrich J, Paninski L: **Fast active set methods for online spike inference from**  
464 **calcium imaging**. In: *Advances In Neural Information Processing Systems: 2016*. 1984-  
465 1992.
- 466 41. Pnevmatikakis EA, Merel J, Pakman A, Paninski L: **Bayesian spike inference from**  
467 **calcium imaging data**. In: *2013 Asilomar Conference on Signals, Systems and*  
468 *Computers: 2013*. IEEE: 349-353.
- 469 42. Nyholt DR: **A simple correction for multiple testing for single-nucleotide**  
470 **polymorphisms in linkage disequilibrium with each other**. *Am J Hum Genet* 2004,  
471 **74(4):765-769**.  
472

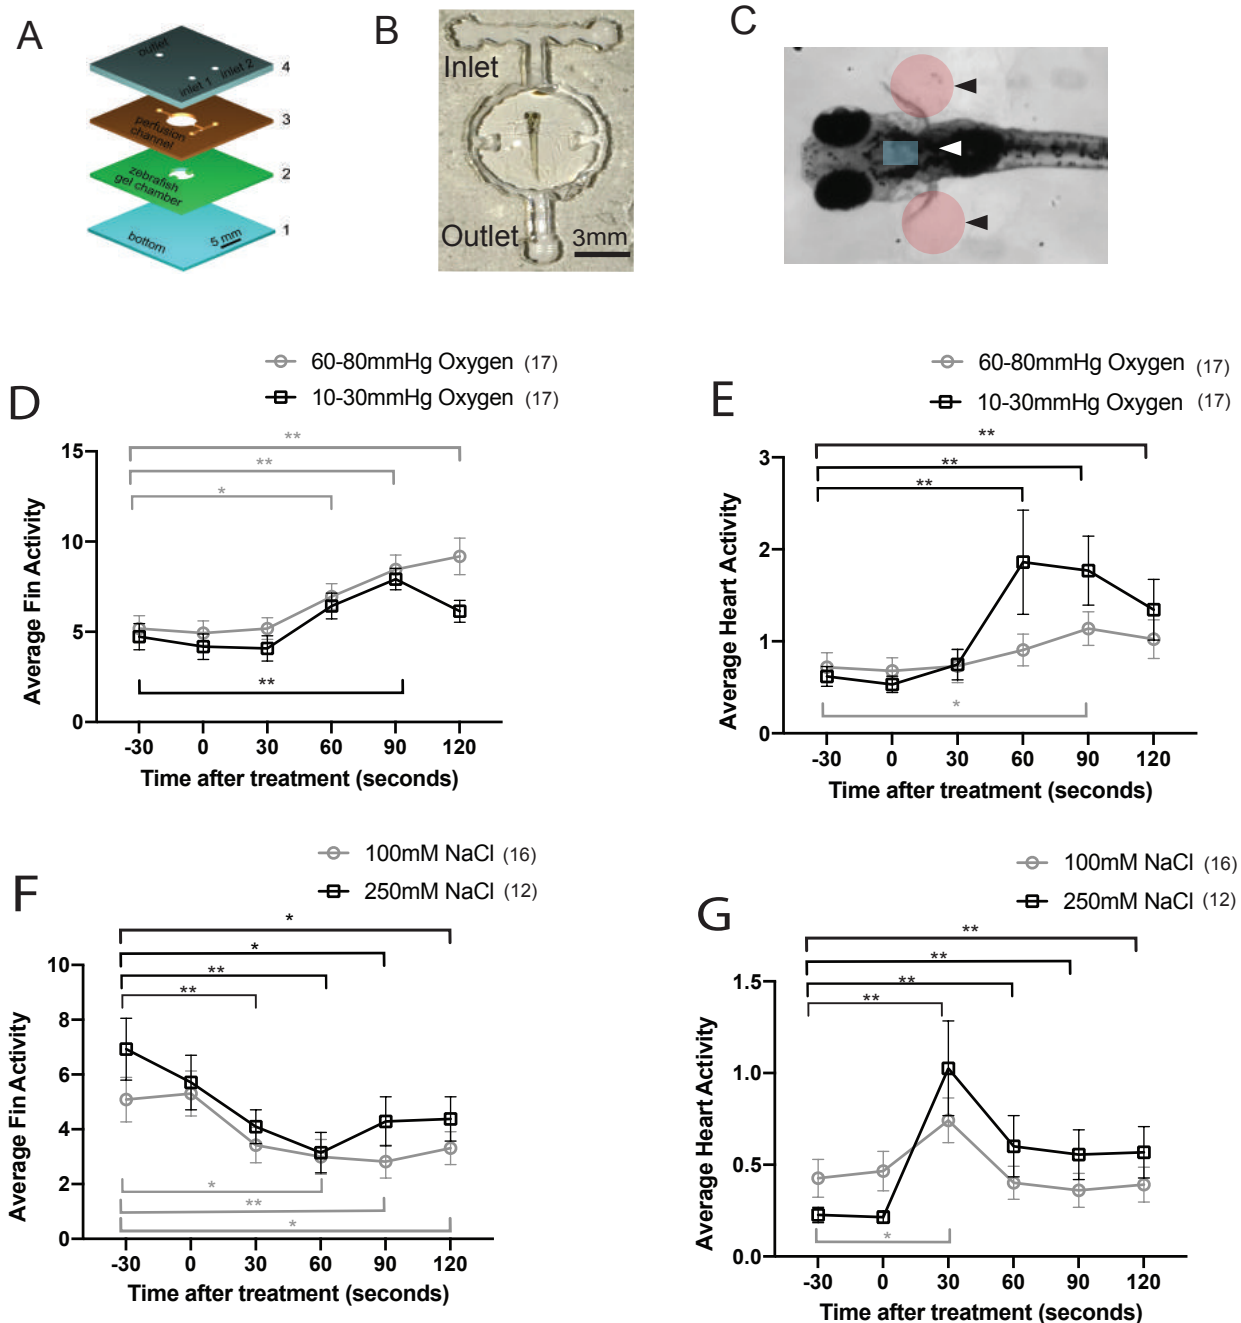

**Figure 1 | Hypoxia induces respiratory behaviors in zebrafish larvae.** **A.**, Schematic showing the laminated microfluidic device made of acrylic layers with a coverglass bottom. **B.**, Photograph of the microfluidic device with a zebrafish larva embedded in agarose gel in the chamber. **C.**, Zebrafish larva with shaded circles (black arrowheads) and rectangles (white arrowheads) identifying pectoral fin and heart movements, respectively. Average (**D.**,) fin activity and (**E.**,) heart activity in zebrafish larvae exposed to hypoxia levels of 10-30 and 60-80 mmHg at  $t = 0$ . Normoxia is 150 mmHg. Zebrafish larvae were exposed to different concentrations of NaCl (osmotic shock) at  $t = 0$  and their (**F.**,) fin and (**G.**,) heart activity was measured. Averages and s.e.m. are shown in (**E-H**),  $n > 12$  with  $*p < 0.1$  and  $**p < 0.05$  using one sample t-test.

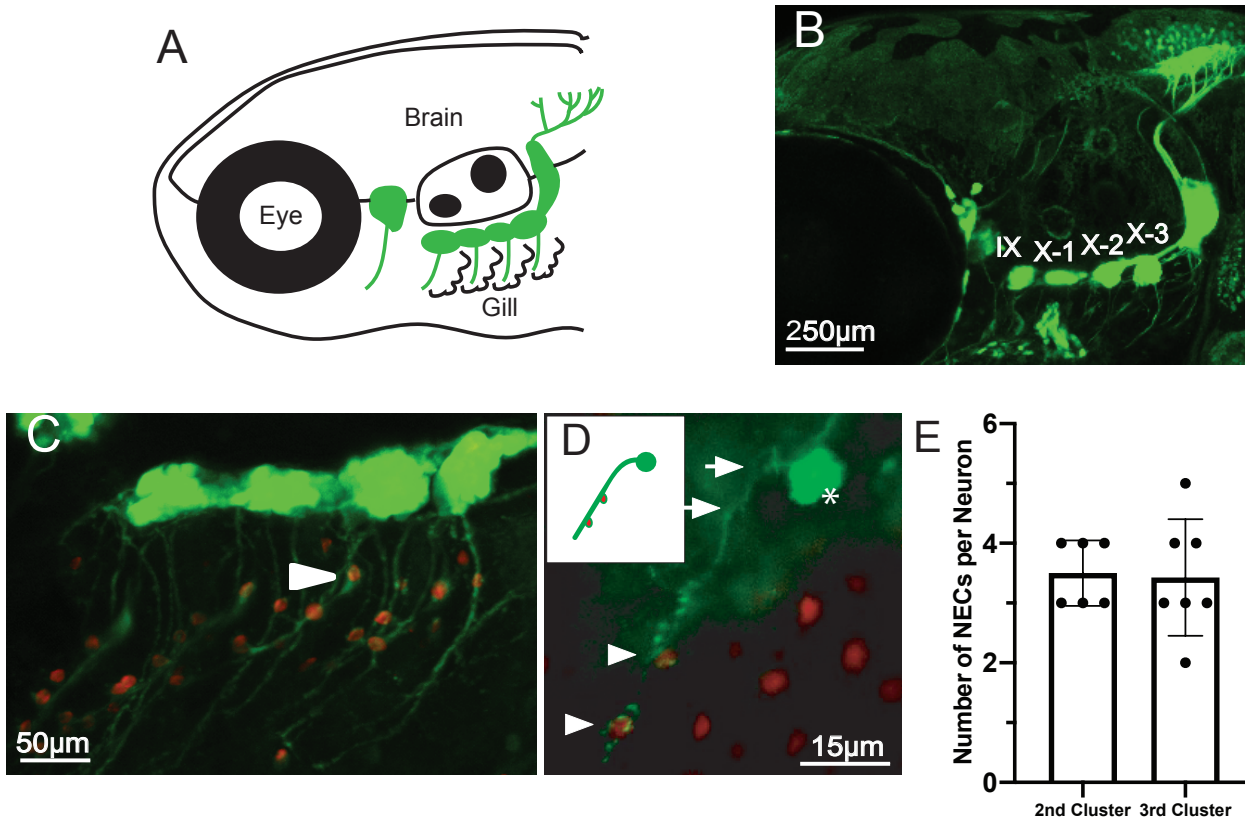

**Figure 2 | A many-to-one circuit encodes oxygen levels.** **A.**, Schematic showing the lateral view of a zebrafish larva with cranial sensory neurons and their projections labeled in green. **B.**, Lateral view of a *Tg(p2rx3.2:gfp)* transgenic larva with neurons in the IX and X cranial sensory ganglia expressing GFP. **C.**, Immunohistochemistry showing a *Tg(p2rx3.2:gfp)* transgenic larva with cranial sensory neurons (green) and neuroendocrine cells (red, NECs) labelled using anti-gfp (green) and anti-serotonin (red) antibodies respectively. Arrowhead indicates an example of cranial nerve afferent wrapping around NECs. **D.**, Immunohistochemistry showing the afferent nerve of an individual vagal sensory neuron (green) wrapping around multiple neuroendocrine cells (red) in a *PB4; UAS:Kaede* transgenic larva labeled using anti-kaede (green) and anti-serotonin (red) antibodies. Asterisk, arrowheads, and arrow indicate the neuron, contact sites between NECs and vagal afferents, and neuronal projection respectively. Inset is the schematic of the neuron. **E.**, Number of NECs wrapped by a single afferent nerve of neurons in either the second or third vagal cluster. Each dot represents an individual vagal sensory neuron; Columns are mean value; bars are S.D.

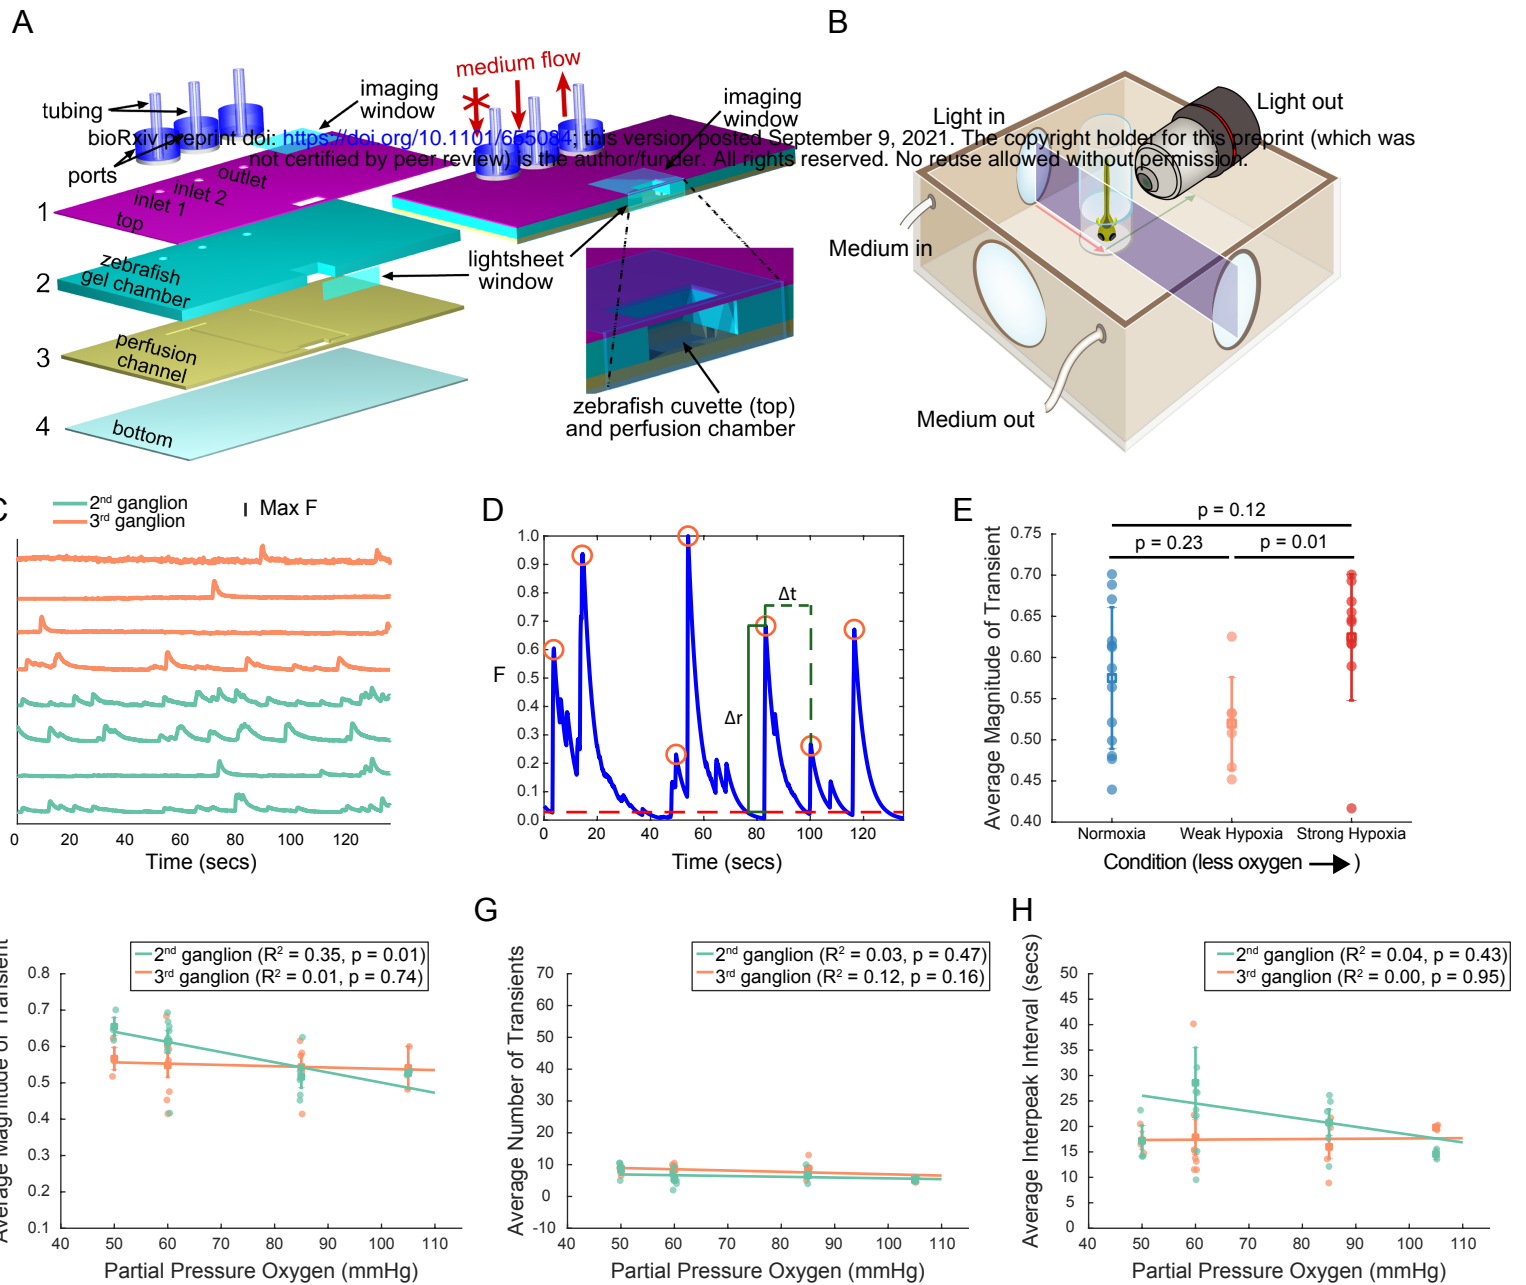

**Figure 3 | Calcium imaging reveals correlation between hypoxia stimuli and magnitude of neural responses in the 2nd, but not 3rd vagal sensory ganglion.** **A.**, Schematic of the microfluidic device with rapid medium exchange for light-sheet microscopy imaging of a zebrafish larva to detect neural activity under acute hypoxia. **B.**, Illustration of light-sheet microscopy. **C.**, Example traces, normalized to peak fluorescence, from ganglion 2 (green) and 3 (orange) of one larva. **D.**, Detecting and validating peaks from the GCaMP time series of a neuron. The red circles mark peaks, the red dashed line is the baseline (10th percentile of normalized fluorescence,  $F$ ), the dashed green line ( $\Delta t$ ) indicates the time between peaks (i.e. interpeak interval) and the solid green line ( $\Delta r$ ) indicates the value of the peak (i.e. magnitude). The trace is normalized by its largest attained magnitude. In the example, and throughout our analysis, we used a weight of 0.7 to validate peaks. **E.**, The average magnitude of calcium transients of neurons in the second ganglion are larger under strong than weak hypoxia, but both are indistinguishable from conditions of normoxia (p-values from rank-sum tests). The average magnitude of (**F**), number of (**G**), and interval between (**H**) calcium transients of neurons of the second (green symbols and lines) and the third (orange symbols and lines) ganglion in a fish exposed to hypoxic conditions is shown. Light circles are the medians across all neurons in a given ganglion from a given fish; bright squares are averages across fish; bars are the S.E.M; lines are least-square fits.

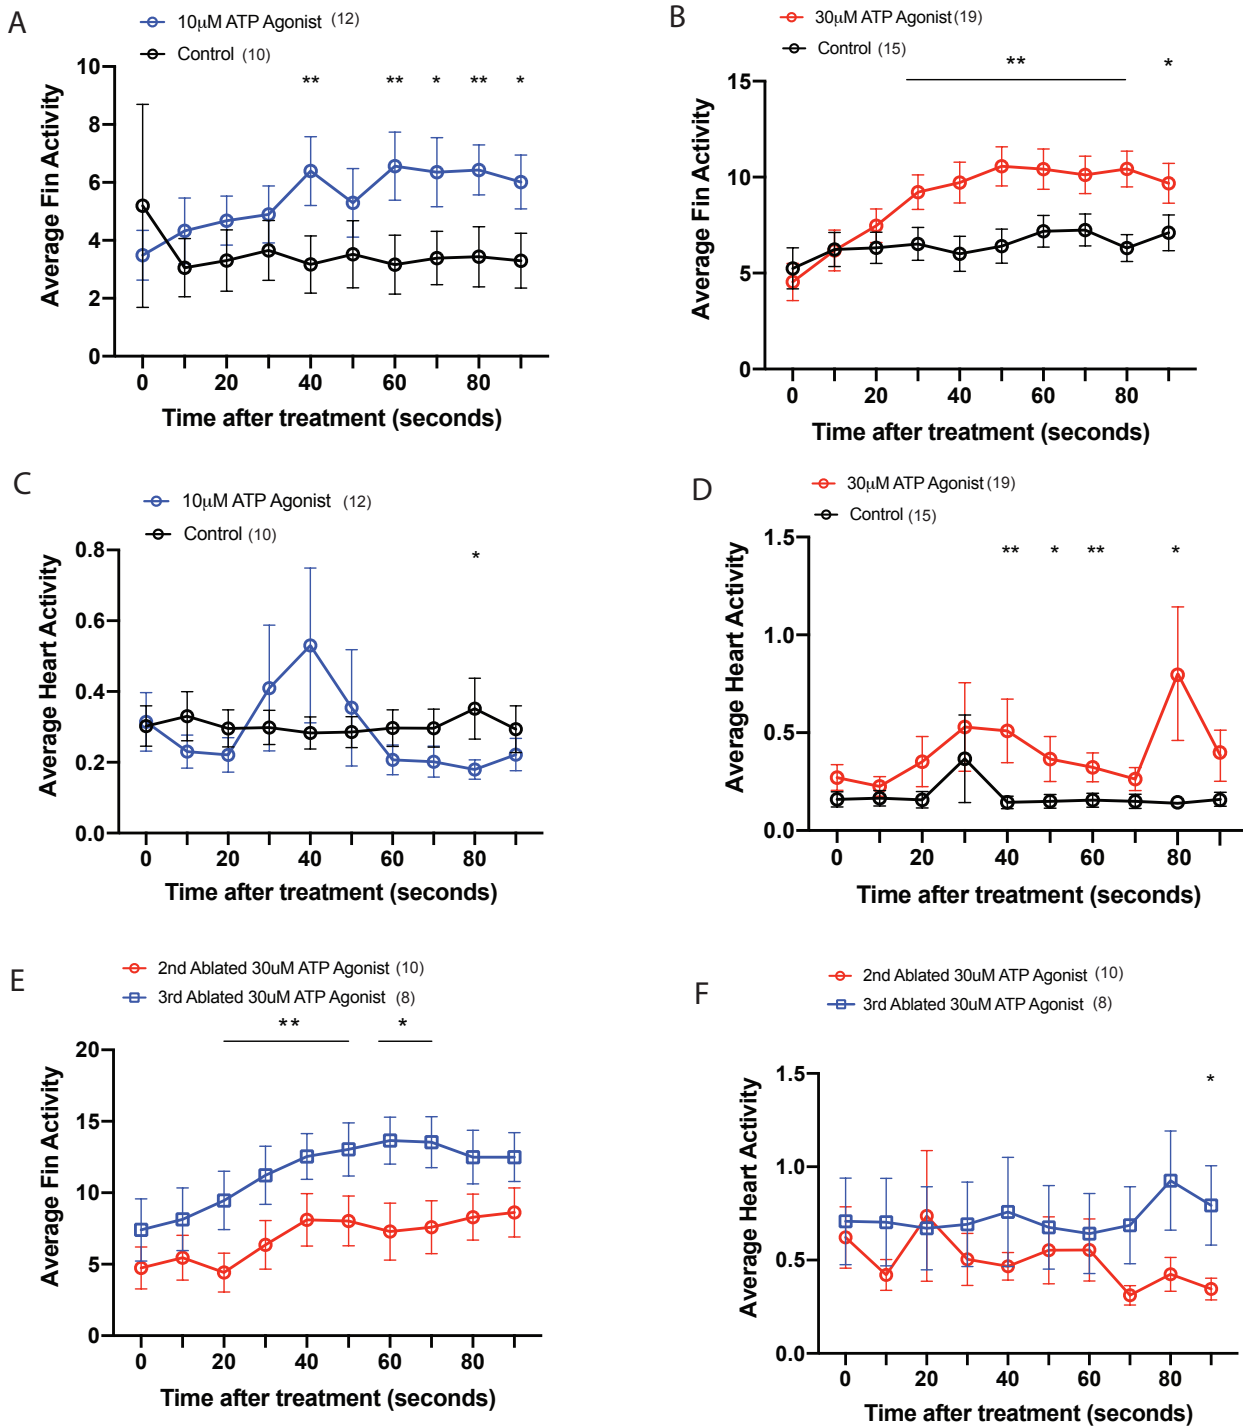

**Figure 4 | ATP Agonist affect average pectoral fin and heart activity.** Average pectoral fin activity in animals exposed to a medium with (A) 10  $\mu$ m or (B) 30  $\mu$ m  $\alpha,\beta$ -methyladenosine, P2 purinoceptor agonist. Average heart activity in animals exposed to (C) 10  $\mu$ m or (D) 30  $\mu$ m  $\alpha,\beta$ -methyladenosine. Ablating neurons in the second, but not third vagal sensory ganglion blocks the P2 purinoceptor agonist induced increase in (E) pectoral fin, not (F) heart activity. Averages and s.e.m. are shown,  $n \geq 8$  with \* indicating  $p < 0.1$  and \*\*  $p < 0.05$  using one sample t-test.
